# Supplementary material for: Elevated Plasma Immunoglobulin Levels Prior to Heart Transplantation Are Associated with Poor Post-Transplantation Survival
Source: MDPI journal article supplement (doi:10.3390/biology12010061), 2022-12-30
Supplement: s1 [file s1]

**Table S1 – Baseline characteristics of patients with myocardial tissue lysates.**

| Characteristics                                              | Number | Percentage / STDEV |
|--------------------------------------------------------------|--------|--------------------|
| <b>Number of patients</b>                                    | 61     |                    |
| <b>Sex</b>                                                   |        |                    |
| Male                                                         | 47     | 78%                |
| Female                                                       | 14     | 23%                |
| <b>Age (years)</b>                                           | 46     | ±13                |
| <b>LVAD pre-HTx</b>                                          | 19     | 31%                |
| <b>Survival post-HTx (years)</b>                             | 6.2    | ±7.1               |
| <b>Primary cardiac diagnosis</b>                             |        |                    |
| ICM                                                          | 28     | 46%                |
| DCM                                                          | 23     | 38%                |
| HCM                                                          | 3      | 5%                 |
| RCM                                                          | 2      | 3%                 |
| Other                                                        | 4      | 7%                 |
| <b>Histological cardiac allograft vasculopathy phenotype</b> |        |                    |
| H-CAV 0                                                      | 12     | 20%                |
| H-CAV 1                                                      | 8      | 13%                |
| H-CAV 2                                                      | 23     | 37%                |
| H-CAV 3                                                      | 18     | 30%                |

*LVAD: left ventricular assist device, HTx: heart transplantation, ICM: idiopathic cardiomyopathy, DCM: dilated cardiomyopathy, HCM: hypertrophic cardiomyopathy, RCM: restrictive cardiomyopathy.*

**Table S2 – Baseline characteristics of subgroup of patients with available plasma samples**

| Characteristics                                              | Number | Percentage / STDEV |
|--------------------------------------------------------------|--------|--------------------|
| <b>Number of patients</b>                                    | 36     |                    |
| <b>Sex</b>                                                   |        |                    |
| Male                                                         | 29     | 81%                |
| Female                                                       | 7      | 19%                |
| <b>Age</b>                                                   | 46     | ±14                |
| <b>LVAD pre-HTx</b>                                          | 14     | 39%                |
| <b>Survival post-HTx (years)</b>                             | 2.6    | ±3.7               |
| <b>Primary cardiac diagnosis</b>                             |        |                    |
| ICM                                                          | 15     | 41%                |
| DCM                                                          | 13     | 36%                |
| HCM                                                          | 2      | 6%                 |
| RCM                                                          | 2      | 6%                 |
| Other                                                        | 4      | 11%                |
| <b>Histological cardiac allograft vasculopathy phenotype</b> |        |                    |
| H-CAV 0                                                      | 10     | 28%                |
| H-CAV 1                                                      | 5      | 14%                |
| H-CAV 2                                                      | 14     | 39%                |
| H-CAV 3                                                      | 7      | 19%                |

LVAD: left ventricular assist device, HTx: heart transplantation, ICM: idiopathic cardiomyopathy, DCM: dilated cardiomyopathy, HCM: hypertrophic cardiomyopathy, RCM: restrictive cardiomyopathy.

**Figure S1: 1-month post-HTx circulating immunoglobulin levels are associated with survival post-HTx.**

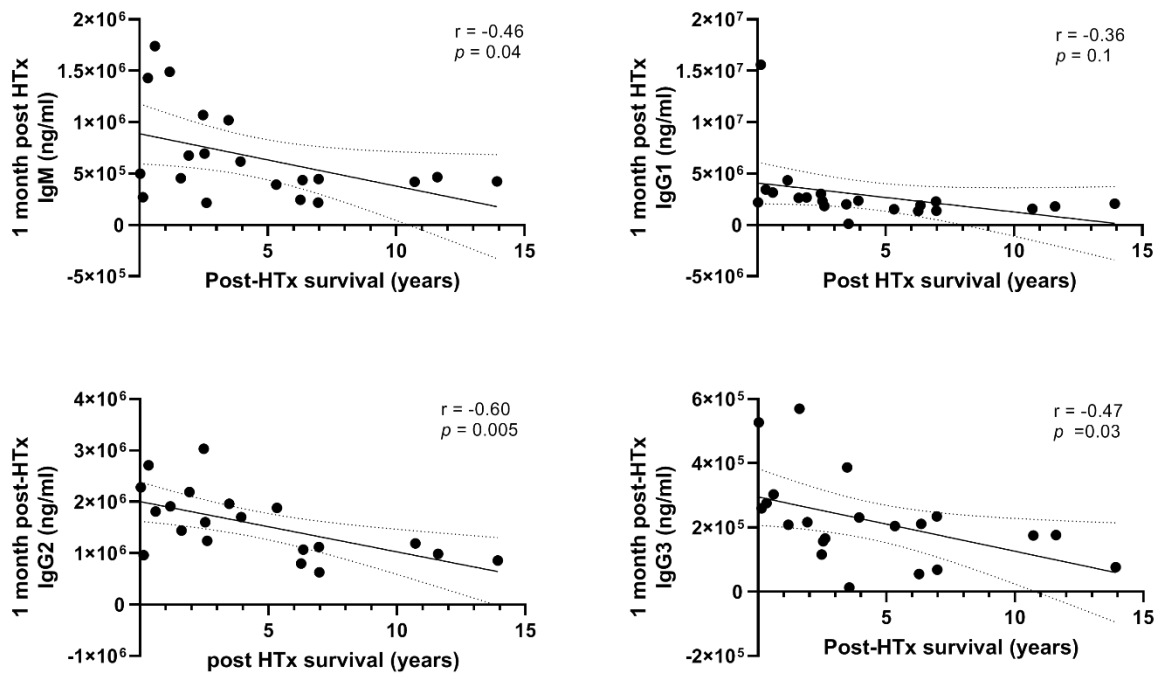

**Supplemental Figure S1:** In the subgroup of patients with survival of  $\geq 1$  month, plasma levels of different immunoglobulin subtypes were measured 1 month post-HTx using multiplex immunoassay and correlated with survival post-HTx. Levels of IgM, IgG2, and IgG3 were significantly correlated with post-HTx survival, where high immunoglobulin levels resulted in a lower survival post-HTx. *HTx: heart transplantation. n=21.*

**Figure S2: Plasma levels of immunoglobulins pre- and post-HTx**

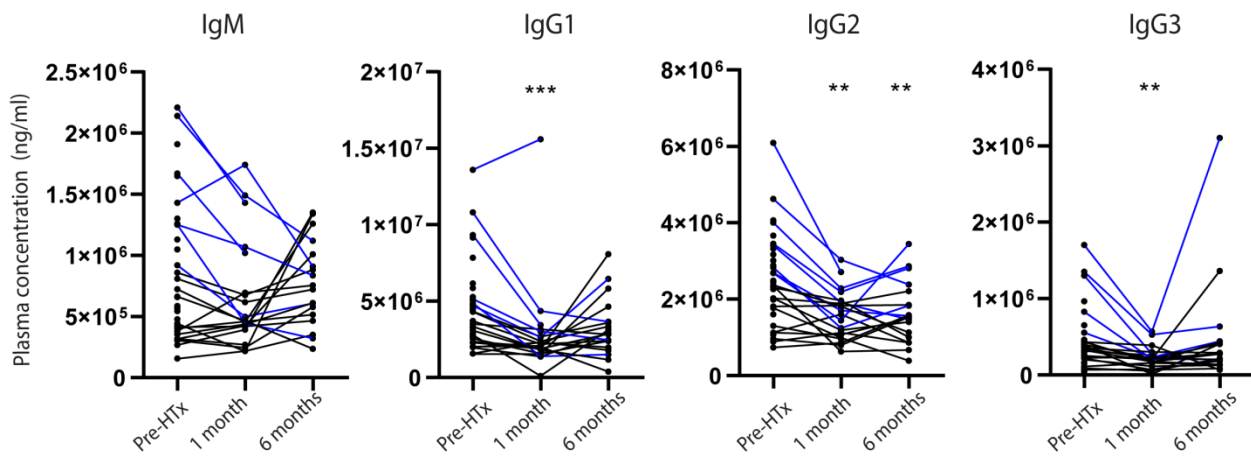

**Supplemental Figure S2:** The levels of immunoglobulins in plasma were measured prior to HTx until 6 months post transplantation. The blue lines represent patients with high pre-HTx levels (above the mean concentration) and the black lines represent patients with low pre-HTx levels (below the mean concentration). Levels of IgG1, IgG2, and IgG3 were significantly decreased after 1 month of HTx compared to pre-HTx levels. After 6 months, immunoglobulin levels seem to increase again, albeit not statistical significant. *HTx: heart transplantation plasma samples pre-HTx n=36, 1 month n=21, 6 months n=19. \*\*  $p < 0.01$ , \*\*  $p < 0.01$ .*
